# Supplementary material for: Cryo-EM structure of the human ferritin–transferrin receptor 1 complex
Source: PubMed Central journal article supplement (PMC6408514; doi:10.1038/s41467-019-09098-w), 2019-03-08
Supplement: 41467_2019_9098_MOESM1_ESM.pdf [file 41467_2019_9098_MOESM1_ESM.pdf]

Supplementary Materials for

**Cryo-EM structure of the human Ferritin-Transferrin Receptor 1 complex**

L.C. Montemiglio, C. Testi, et al.

**This PDF file includes:**

Supplementary Figure 1 to 6

Supplementary Table 1 to 6

Supplementary References

## Supplementary Information

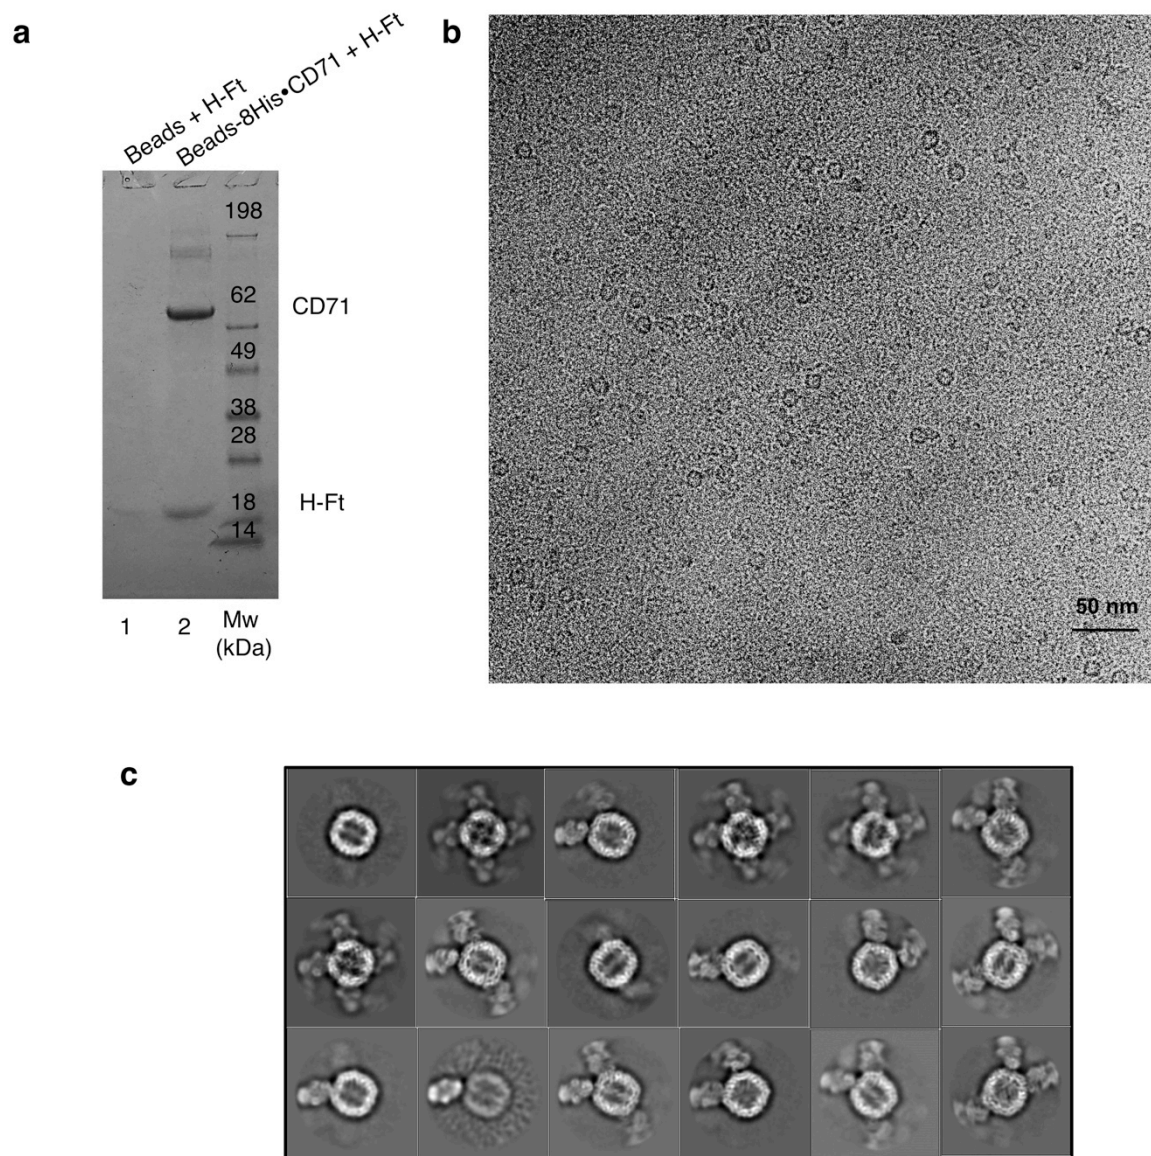

### Supplementary Figure 1. CD71/H-Ft complex preparation, cryo-EM images and 2D averages.

**a.** Pull-down assay: CD71/H-Ft complex preparation. SDS-PAGE of proteins eluted with 290 mM imidazole from TALON resin beads not treated (lane 1) and treated (lane 2) with His-tagged CD71 (8His•CD71, monomer Mw~75 kDa) followed by H-Ft (monomer Mw~21 kDa). H-Ft shows negligible level of non-specific binding to the beads in the absence of CD71. H-Ft binding results markedly enhanced when CD71 is bound to the resin. Gel was stained by Coomassie blue and it is shown in greyscale color. Molecular Weight (Mw) Marker: SeeBlue Prestained Standard (Thermo Fisher Scientific, USA). Source data are provided as a Source Data file. **b.** Representative micrograph of CD71/H-Ft. **c.** Representative 2D class averages as calculated with RELION.

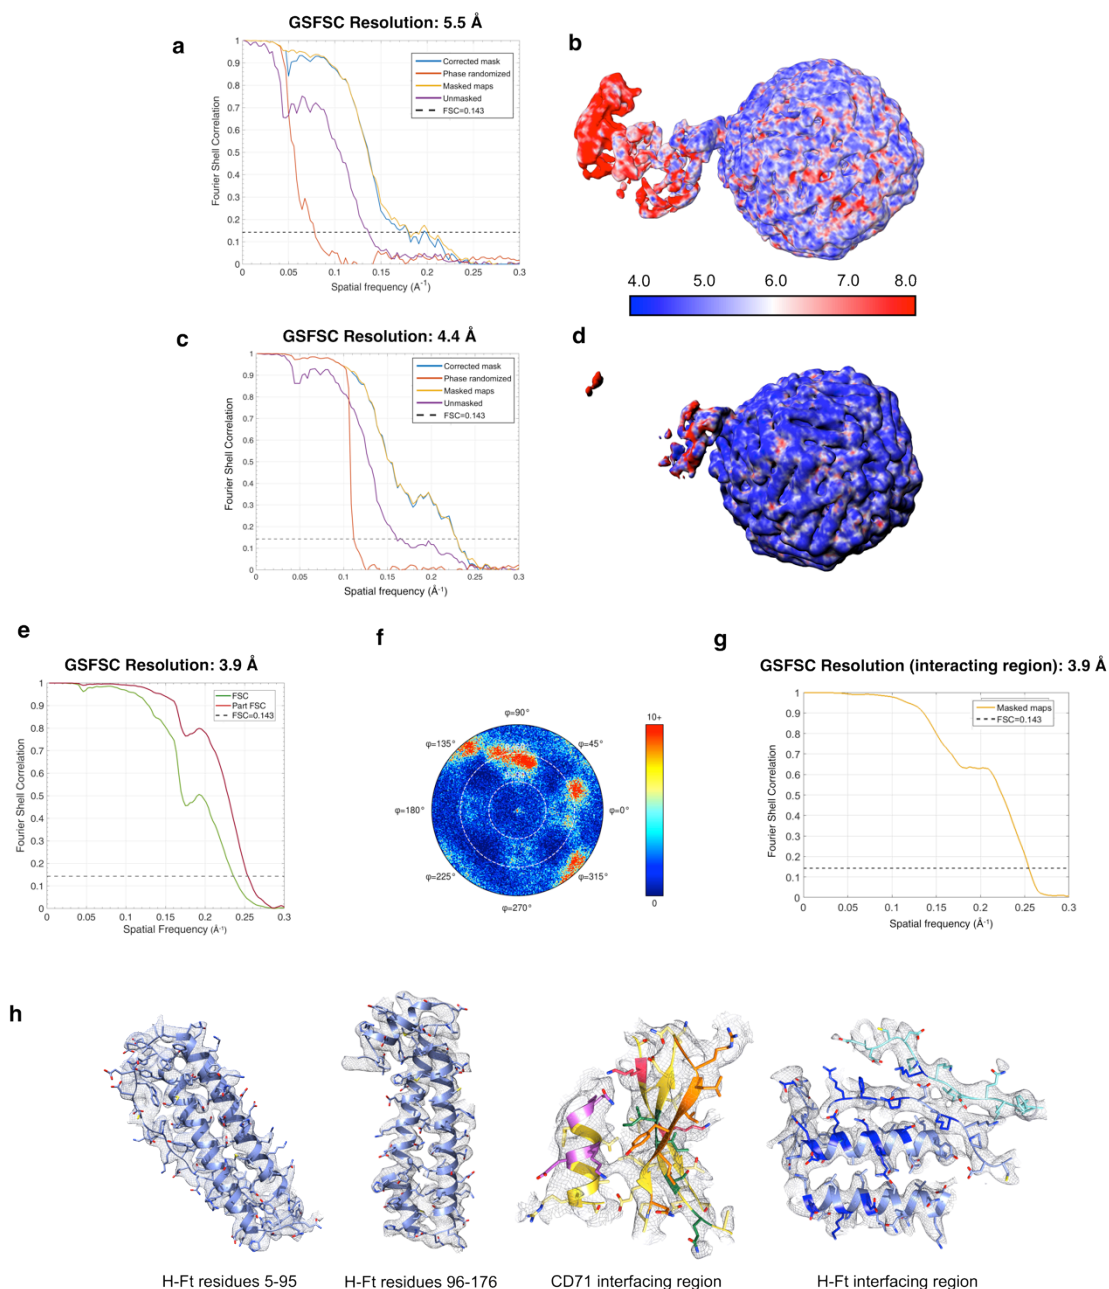

**Supplementary Figure 2. CD71/H-Ft complex cryo-EM resolution map.** **a, c.** Gold standard FSC curves of the global maps at 5.5 Å (**a**) and 4.4 Å (**c**) calculated in RELION. In the 5.5 Å map, both CD71 and H-Ft were visible at the level of their secondary structures. **b, d.** The final 5.5 Å (**b**) and 4.4 Å (**c**) maps are colored according to local resolution estimated by RESMAP. **e, f.** Gold standard FSC curves of the final global map at 3.9 Å (**e**) and angular distribution of particle projections calculated in cisTEM (**f**). Color bar: red represents the most populated projection (+10 particles) and blue the least populated. **g.** FSC curve of the electron density map which only includes the contact region between CD71 ectodomain and H-Ft. The resolution is 3.9 Å based on the gold-standard 0.143 FSC criterion. **h.** Representative cryo-EM density of different parts of H-Ft and for the interfacing regions of CD71 and H-Ft.

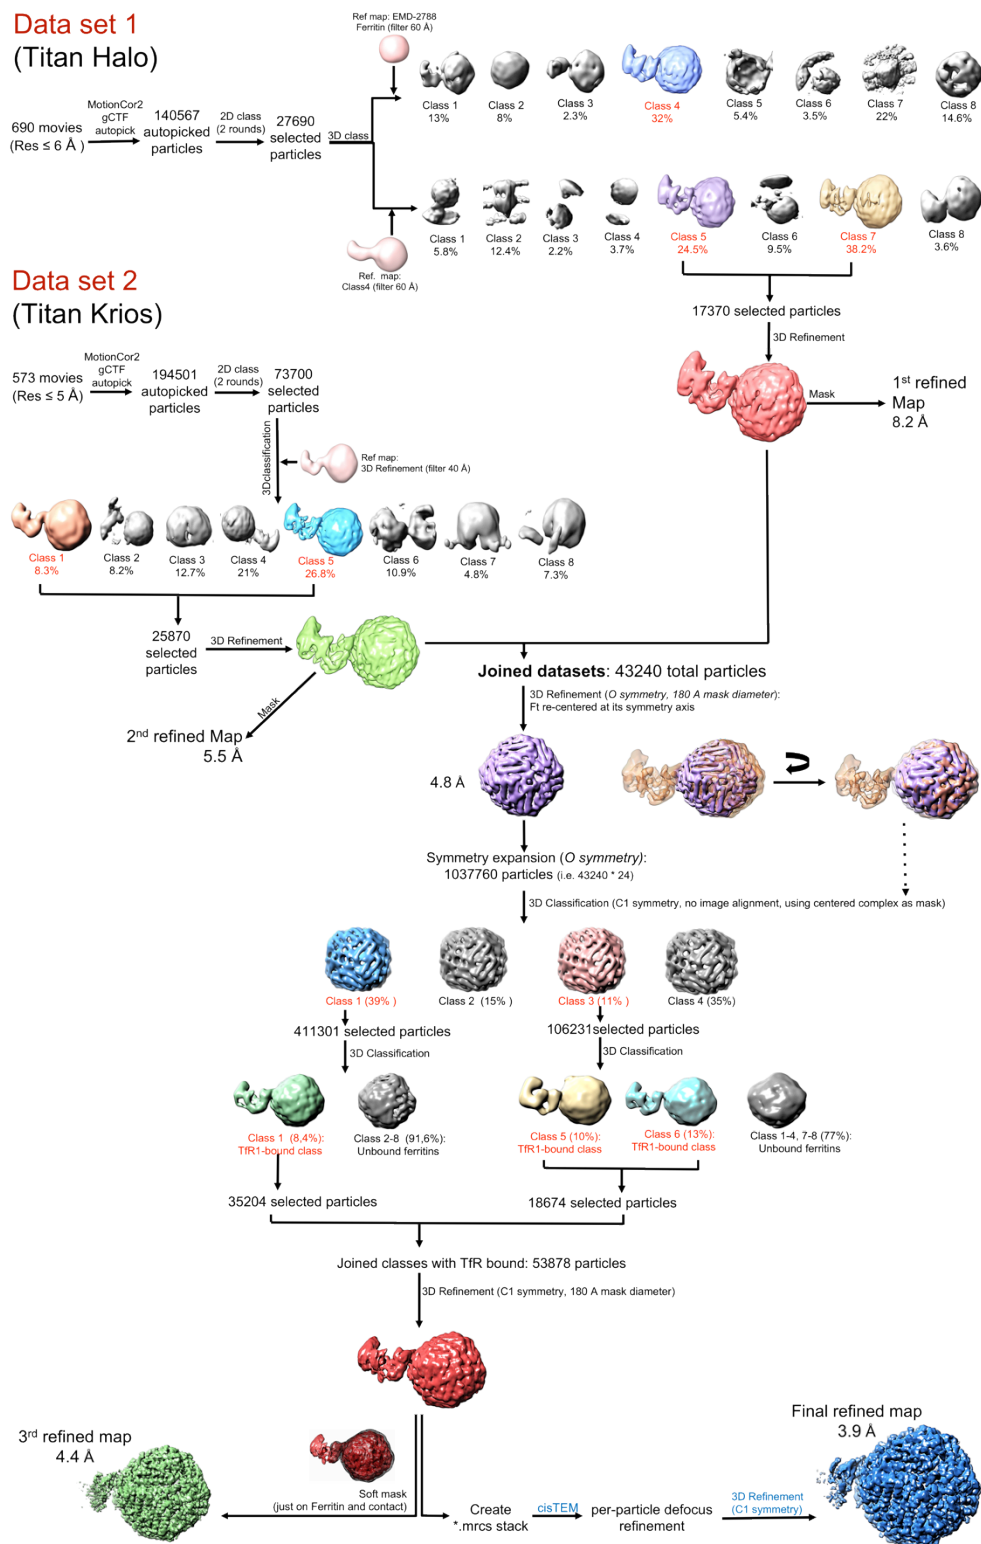

**Supplementary Figure 3. Data processing workflow for CD71/H-Ft complex.** Schematic diagram of dataset 1 and 2 processing for the 5.5 Å, 4.4 Å global map (obtained with RELION) and the 3.9 Å final map (obtained with *cisTEM*). Volume density is displayed for each class and final refinement as well as percentage distribution and number of particles.

**a**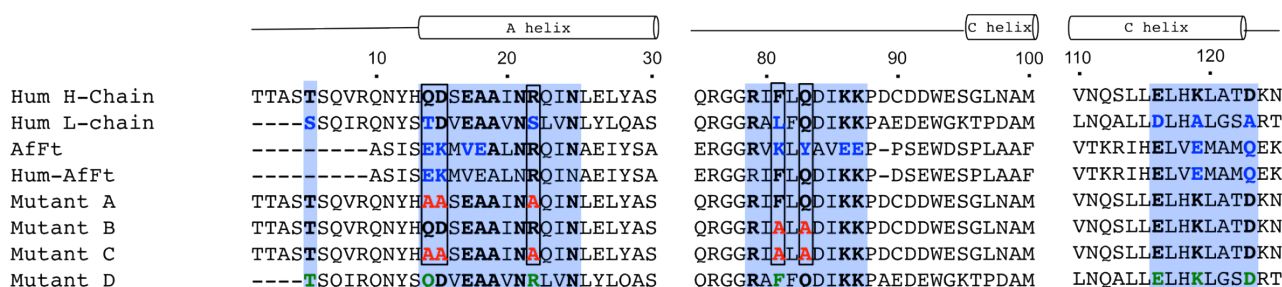**b**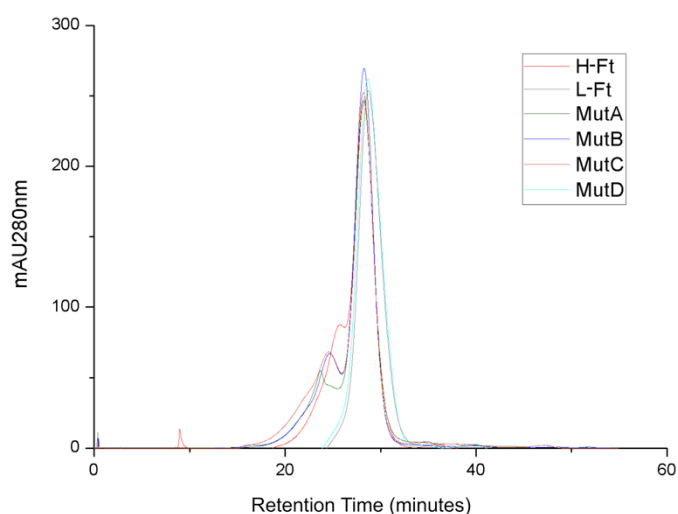

**Supplementary Figure 4. Structure-based sequence alignment of ferritins and 24-mer assembly assessment.** **a.** Partial structure-based sequence alignment of the regions contacting CD71 receptor of human H- (Hum H-chain) and L-chain (Hum L-chain) ferritins, *A. fulgidus* (AfFt) and humanized *A. fulgidus* (Hum-AfFt) ferritins, mutant A, B, C and D (amino acids 1-30, 70-100 and 110-125) was made using ClustalW2<sup>1</sup>. Elements of secondary structure of human H-Ft are shown on the top, using cylinder representation for  $\alpha$ -helices. Colored background highlights the H-Ft contact regions with CD71; black bold residues indicate interacting human H-Ft amino acids and conserved among ferritins; for other ferritins, not conserved residues are shown in blue and mutated residues are in red. Mutations introduced to convert the Hum L-chain in Hum H-chain are in green (Mutant D). Black boxes indicate residues identified as critical for the CD71 epitope recognition. **b.** Gel filtration chromatographic profile of ferritins utilized in this study. A main peak at retention times typical of the human ferritin wild type (28.2 min) is present, thus proving that all mutants retain the 24-mer assembly of the human wild type ferritins. In addition, a pre-peak at about 25 min is also observed in the H-chain constructs. This was previously ascribed to the presence of cysteine residues (2 per subunit, 48 for 24-mer) on the surface of the H-chain ferritins that are absent in the L-chain proteins<sup>2</sup>.

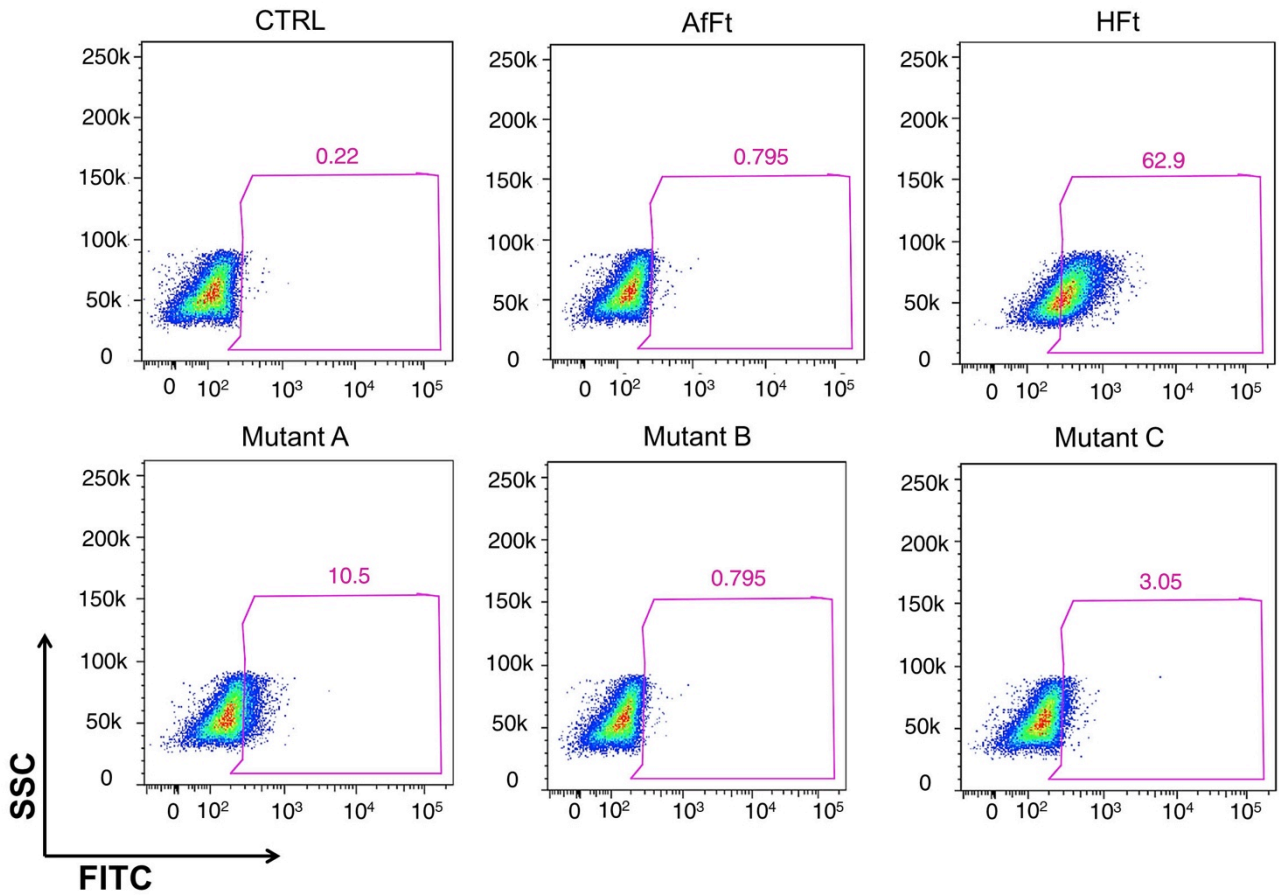

**Supplementary Figure 5. Internalization analysis in HeLa cells by flow cytometry.** Representative FACS plot from the data reported in Figure 3b, showing the uptake of FITC-conjugated AfFt, H-Ft, Mutant A, Mutant B, Mutant C in HeLa cells after 2 hours and 30 minutes. The gate for the specific signal was set based on the control sample (CTRL) and the percentage of FITC positive cells is indicated in pink in each plot. For each sample, 30,000 events were acquired. Source data are provided as a Source Data file.

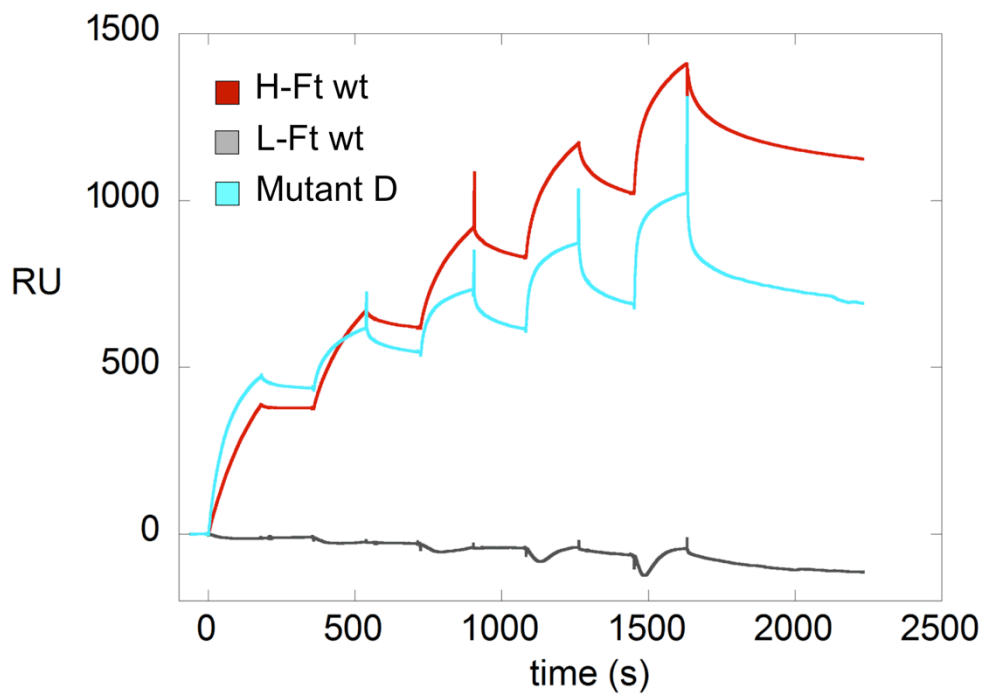

**Supplementary Figure 6. Single kinetic SPR assay.** SPR sensograms of the interaction between the immobilized his-tagged CD71 receptor and H-Ft wt (red line), L-Ft wt (grey line) and mutant D (cyan line), used as analytes. Analyte concentration is increased in five consecutive steps from 18.75  $\mu\text{g}/\text{mL}$  to 300  $\mu\text{g}/\text{mL}$ . Source data are provided as a Source Data file.

**Supplementary Table 1. Cryo-EM data collection, refinement and validation statistics**

|                                                  | <b>CD71/H-Ft complex at 5.5 Å</b><br><b>EMD-0046</b><br><b>PDB 6GSR</b> | <b>CD71/H-Ft complex at 3.9 Å</b><br><b>EMD-0140</b><br><b>PDB 6H5I</b> |
|--------------------------------------------------|-------------------------------------------------------------------------|-------------------------------------------------------------------------|
| <b>Data collection and processing</b>            |                                                                         |                                                                         |
| Magnification                                    | 121K                                                                    | 107K                                                                    |
| Voltage (kV)                                     | 300                                                                     | 300                                                                     |
| Electron exposure (e-/Å <sup>2</sup> )           | 40                                                                      | 40                                                                      |
| Pixel size (Å)                                   | 1.33                                                                    | 1.15, 1.33                                                              |
| Symmetry imposed                                 | C1                                                                      | O, C1                                                                   |
| Initial particle images (no.)                    | 194501                                                                  | 43240                                                                   |
| Final particle images (no.)                      | 25870                                                                   | 53878                                                                   |
| Map resolution (Å)                               | 5.5                                                                     | 3.9                                                                     |
| FSC threshold                                    | 0.143                                                                   | 0.143                                                                   |
| Map resolution range (Å)                         | 4.0-8.0                                                                 | 4.0-8.0                                                                 |
| <b>Refinement</b>                                |                                                                         |                                                                         |
| Initial model used (PDB code)                    | 3KAS, 3AJ0                                                              | 3KAS, 3AJ0                                                              |
| Model resolution (Å)                             | 5.5                                                                     | 3.9                                                                     |
| FSC threshold                                    | 0.143                                                                   | 0.143                                                                   |
| Map sharpening <i>B</i> factor (Å <sup>2</sup> ) | -350                                                                    | -272                                                                    |
| Model composition                                |                                                                         |                                                                         |
| Non-hydrogen atoms                               | 45308                                                                   | 43900                                                                   |
| Protein residues                                 | 5392                                                                    | 5392                                                                    |
| <i>B</i> factors (Å <sup>2</sup> )               |                                                                         |                                                                         |
| Proteins (min, max)                              | 21.4 (5.5, 181.1)                                                       | 169.2 (71.5, 505.5)                                                     |
| R.m.s. deviations                                |                                                                         |                                                                         |
| Bond lengths (Å)                                 | 0.0059                                                                  | 0.0065                                                                  |
| Bond angles (°)                                  | 1.00                                                                    | 1.11                                                                    |
| Validation                                       |                                                                         |                                                                         |
| MolProbity score                                 | 1.45                                                                    | 1.36                                                                    |
| Clashscore                                       | 5.94                                                                    | 2.7                                                                     |
| Poor rotamers (%)                                | 1.20                                                                    | 0.17                                                                    |
| EMRinger score                                   | 1.06                                                                    | 1.92                                                                    |
| Ramachandran plot                                |                                                                         |                                                                         |
| Favored (%)                                      | 97.73                                                                   | 95.69                                                                   |
| Allowed (%)                                      | 2.15                                                                    | 4.31                                                                    |
| Disallowed (%)                                   | 0.11                                                                    | 0                                                                       |



**Supplementary Table 2. Summary of interactions between CD71 and H-Ft**

| CD71                                                             | Group | Location         | H-Ft   | Group | Location | Distance (Å) | <sup>+</sup> exclusive/<br>common |
|------------------------------------------------------------------|-------|------------------|--------|-------|----------|--------------|-----------------------------------|
| <b>Electrostatic interactions (hydrogen bonds, salt bridges)</b> |       |                  |        |       |          |              |                                   |
| Ser195                                                           | OG    | loop βI-1-βII-1  | Asp123 | OD1   | helix C  | 4.4          | exclusive                         |
| Ser195                                                           | OG    | loop βI-1-βII-1  | Asp123 | OD2   | helix C  | 3.7          | exclusive                         |
| Gln197                                                           | OE1   | loop βI-1-βII-1  | Lys119 | NZ    | helix C  | 3.3          | exclusive                         |
| Gln197                                                           | NE2   | loop βI-1-βII-1  | Glu116 | OE2   | helix C  | 4.8          | exclusive                         |
| Ser199                                                           | OG    | strand βII-1     | Asp15  | OD1   | helix A  | 4.8          | exclusive                         |
| Ser199                                                           | OG    | strand βII-1     | Asp15  | OD2   | helix A  | 5.0          | exclusive                         |
| Arg208                                                           | NH1   | loop βII-1-βII-2 | Thr5   | N     | N-term   | 3.7          | common                            |
| Arg208                                                           | NH2   | loop βII-1-βII-2 | Thr5   | O     | N-term   | 4.0          | common                            |
| Arg208                                                           | NH2   | loop βII-1-βII-2 | Arg79  | NH2   | loop BC  | 3.6          | common                            |
| Val210                                                           | O     | strand βII-2     | Asn21  | ND2   | helix A  | 3.0          | common                            |
| Asn215                                                           | OD1   | loop βII-2-βII-3 | Arg22  | NH1   | helix A  | 3.3          | common                            |
| Asn215                                                           | OD1   | loop βII-2-βII-3 | Arg22  | NH2   | helix A  | 3.3          | common                            |
| Asn215                                                           | ND2   | loop βII-2-βII-3 | Glu116 | OE1   | helix C  | 2.7          | common                            |
| Asn215                                                           | ND2   | loop βII-2-βII-3 | Glu116 | OE2   | helix C  | 4.0          | common                            |
| Lys344                                                           | NZ    | helix αII-2      | Asn25  | OD1   | helix A  | 3.6          | common                            |
| Gly347                                                           | O     | helix αII-2      | *Lys87 | NZ    | *loop BC | 3.6          | common                            |
| Asn348                                                           | OD1   | helix αII-2      | *Lys87 | NZ    | *loop BC | 3.0          | common                            |
| Asn348                                                           | ND2   | helix αII-2      | Gln83  | OE1   | loop BC  | 3.5          | common                            |
| Lys374                                                           | NZ    | strand βII-8     | Gln14  | OE1   | helix A  | 3.4          | exclusive                         |
| Lys374                                                           | NZ    | strand βII-8     | Asp15  | OD1   | helix A  | 5.0          | exclusive                         |
| <b>Hydrophobic interactions</b>                                  |       |                  |        |       |          |              |                                   |
| Ile201                                                           | CD1   | strand βII-1     | Ala18  | CB    | helix A  | 4.2          | common                            |
| Ile201                                                           | CG2   | strand βII-1     | Ala18  | CB    | helix A  | 4.5          | common                            |
| Leu209                                                           | CD1   | strand βII-2     | Gln14  | CG    | helix A  | 4.5          | common                            |
| Leu209                                                           | CD2   | strand βII-2     | Arg79  | CG    | loop BC  | 3.8          | common                            |
| Val210                                                           | CG1   | strand βII-2     | Gln14  | CB    | helix A  | 4.8          | common                            |
| Val210                                                           | CG2   | strand βII-2     | Glu17  | CB    | helix A  | 4.4          | common                            |
| Val210                                                           | CG2   | strand βII-2     | Glu17  | CG    | helix A  | 4.4          | common                            |
| Val210                                                           | CG2   | strand βII-2     | Ala18  | CB    | helix A  | 4.4          | common                            |
| Tyr211                                                           | CD1   | strand βII-2     | Asn21  | CB    | helix A  | 3.7          | common                            |
| Tyr211                                                           | CE1   | strand βII-2     | Gln83  | CB    | loop BC  | 4.7          | common                            |
| Tyr211                                                           | CE2   | strand βII-2     | Gln83  | CG    | loop BC  | 3.6          | common                            |
| Tyr211                                                           | CE2   | strand βII-2     | Gln83  | CD    | loop BC  | 4.4          | common                            |
| Tyr211                                                           | CD2   | strand βII-2     | Gln83  | CD    | loop BC  | 4.5          | common                            |
| Tyr211                                                           | CG    | strand βII-2     | Phe81  | CD2   | loop BC  | 4.9          | common                            |
| Leu212                                                           | CB    | strand βII-2     | Ala18  | CB    | helix A  | 3.6          | common                            |
| Leu212                                                           | CB    | strand βII-2     | Arg22  | CB    | helix A  | 4.2          | common                            |
| Leu212                                                           | CD2   | strand βII-2     | Ala19  | CB    | helix A  | 4.3          | common                            |
| Leu212                                                           | CG    | strand βII-2     | Arg22  | CG    | helix A  | 4.7          | common                            |

CD71 residues are colored according to the color code used in Figure 2 panel a (right side).

**Supplementary Table 3.** Summary of the interfacing residues at CD71 apical domain contacted by the human H-Ft, GP1 of Machupo virus<sup>3</sup> and PvRBP2b of *P. vivax*<sup>4</sup>.

| Human CD71 | Human H-Ft         | GP1 (MACV)                | PvRBP2b ( <i>P. vivax</i> ) |
|------------|--------------------|---------------------------|-----------------------------|
| S195       | K119, D123         |                           |                             |
| Q197       | E116               |                           |                             |
| S199       | D15                |                           |                             |
| I201       | A18                | F226                      |                             |
| D204       |                    | D114                      |                             |
| R208       | T5, R79            |                           | N527, E530, D531            |
| L209       | Q14, R79, F81      | S97, F98                  |                             |
| V210       | Q14, E17, A18, N21 | R111, F226, Y228          |                             |
| Y211       | F81, Q83           | R111, S113, I115,<br>V117 | S541                        |
| L212       | A18, A19, R22      | P223, F226                | Y542                        |
| V213       |                    |                           | Y604                        |
| E214       |                    |                           | K600                        |
| N215       | R22, E116          | E171                      | D603                        |
| A293       |                    | Y122                      |                             |
| E294       |                    | M119, Y122, K169          | K600                        |
| E343       | K86                | Y122                      |                             |
| K344       | N25                | M119, D123, K169          | Y604                        |
| N348       | Q83, *K87          | D114, S116                |                             |
| S370       |                    | D114                      |                             |
| K371       |                    | S116                      | Y538                        |
| K374       | Q14, D15           |                           |                             |

CD71 residues contacted by H-Ft are colored according to the color code used in Figure 2 panel a (right side).

**Supplementary Table 4. Kinetic and thermodynamic parameters for SPR experiments: heterogeneous analyte fit.**

| <b>Protein Analyte</b> | $k_{on1}$ ( $M^{-1}s^{-1}$ ) | $k_{off1}$ ( $s^{-1}$ )     | $K_{D1}$ (nM) | $k_{on2}$ ( $M^{-1}s^{-1}$ ) | $k_{off2}$ ( $s^{-1}$ )     | $K_{D2}$ ( $\mu M$ ) |
|------------------------|------------------------------|-----------------------------|---------------|------------------------------|-----------------------------|----------------------|
| <b>H-Ft</b>            | $(4.78 \pm 0.07) * 10^5$     | $(3.40 \pm 0.06) * 10^{-3}$ | $7.1 \pm 0.2$ | $(1.69 \pm 0.04) * 10^5$     | $(2.51 \pm 0.06) * 10^{-2}$ | $0.156 \pm 0.007$    |
| <b>Mutant A</b>        | $(1.1 \pm 0.2) * 10^6$       | $(6.5 \pm 0.9) * 10^{-1}$   | $570 \pm 170$ | $(1.4 \pm 0.1) * 10^4$       | $(2.7 \pm 0.1) * 10^{-2}$   | $1.9 \pm 0.3$        |
| <b>Mutant B</b>        | $(1.5 \pm 0.3) * 10^6$       | $(3.3 \pm 0.2) * 10^{-1}$   | $220 \pm 80$  | $(1.7 \pm 0.2) * 10^2$       | $(2.76 \pm 0.04) * 10^{-2}$ | $158 \pm 18$         |
| <b>Mutant C</b>        | Not feasible                 |                             |               |                              |                             |                      |

**Supplementary Table 5. Kinetic and thermodynamic parameters for SPR experiments: simple 1:1 binding mode.**

| <b>Protein Analyte</b> | $k_{on1}$ ( $M^{-1}s^{-1}$ ) | $k_{off1}$ ( $s^{-1}$ )         | $K_{D1}$ (nM)  |
|------------------------|------------------------------|---------------------------------|----------------|
| <b>H-Ft</b>            | $(3.74 \pm 0.08) \cdot 10^4$ | $(6.72 \pm 0.08) \cdot 10^{-4}$ | $17.9 \pm 0.6$ |
| <b>Mutant A</b>        | $(1.7 \pm 0.2) \cdot 10^5$   | $(1.8 \pm 0.2) \cdot 10^{-3}$   | $140 \pm 50$   |
| <b>Mutant B</b>        | $(6.6 \pm 0.7) \cdot 10^4$   | $(8.9 \pm 0.8) \cdot 10^{-3}$   | $130 \pm 30$   |
| <b>Mutant C</b>        | $1200 \pm 100$               | $(1.55 \pm 0.03) \cdot 10^{-3}$ | $1300 \pm 100$ |

**Supplementary Table 6. DNA sequences for all synthetic genes and primers used in this study.**

|                                        |                                                                                                                                                                                                                                                                                                                                                                                                                                                                                                                                                                                                                                                                                                            |
|----------------------------------------|------------------------------------------------------------------------------------------------------------------------------------------------------------------------------------------------------------------------------------------------------------------------------------------------------------------------------------------------------------------------------------------------------------------------------------------------------------------------------------------------------------------------------------------------------------------------------------------------------------------------------------------------------------------------------------------------------------|
| H-Ft<br>(nucleotide sequence)          | ACGACCGCGTCCACCTCGCAGGTGCGCCAGAACTACCACCAGGACTCAGAGGCCGCCATCAAC<br>CGCCAGATCAACCTGGAGCTCTACGCCTCCTACGTTTACCTGTCCATGTCTTACTACTTTGAC<br>CGCGATGATGTGGCTTTGAAGAACTTTGCCAAATACTTTCTTACCACATCTCATGAGGAGAGG<br>GAACATGCTGAGAACTGATGAAGCTGCAGAACCAACGAGGTGGCCGAATCTTCCCTCAGGAT<br>ATCAAGAAACCAGACTGTGATGACTGGGAGAGCGGGCTGAATGCAATGGAGTGTGCATTACAT<br>TTGGAAAAAATGTGAATCAGTCACTACTGGAAGTGCACAACTGGCCACTGACAAAAATGAC<br>CCCCATTTGTGTGACTTCATTGAGACACATTACCTGAATGAGCAGGTGAAAGCCATCAAAGAA<br>TTGGGTGACCACGTGACCAACTTTCGCAAGATGGGAGCGCCGAATCTGGCTTGCCGAATAT<br>CTCTTTGACAAGCACACCCTGGGAGACAGTGATAATGAAAGC                                                                                                              |
| H-Ft Mutant A<br>(nucleotide sequence) | CTCTAGAAATAATTTTGTTTAACTTTAAGAAGGAGATATACATATGACCACCGCAAGCACCAG<br>CCAGGTTTCGTGAGAATTATCATGCAGCAAGCGAAGCAGCAATTAATGCACAGATTAATTTGGA<br>ACTGTATGCCAGCTATGTGTATCTGAGCATGAGCTATTATTTTCGATCGTGATGATGTTGCCCT<br>GAAAACTTCGCAAAATACTTTCTGCATCAGAGCCATGAAGAACGTGAACATGCAGAAAACT<br>GATGAAACTGCAGAATCAGCGTGGTGGTTCGTATCTTCTGCAGGATATCAAAAAACCGGATTG<br>TGATGATTGGGAAAGCGGTCTGAATGCAATGGAATGTGCACTGCATCTGGAAAAAATGTTAA<br>TCAGAGCCTGCTGGAAGTGCATAAACTGGCAACCGATAAAAAATGATCCGCATCTGTGCGATTT<br>TATCGAAACCCATTATCTGAACGAACAGGTGAAAGCCATTAAGAAGTGGGTGATCATGTTAC<br>CAATCTGCGTAAATGGGTGCACCGGAAAGTGGTCTGGCAGAATACCTGTTTGATAAACATAC<br>CCTGGGTGATAGCGATAACGAAAGCTAATAAGGATCCGGCTGCTAACAAAGCCCGAAAGGAAG<br>CTGAGTTGGCTGCT |
| H-Ft Mutant B<br>(nucleotide sequence) | CTCTAGAAATAATTTTGTTTAACTTTAAGAAGGAGATATACATATGACCACCGCAAGCACCAG<br>CCAGGTTTCGTGAGAATTATCATCAGGATAGCGAAGCAGCAATTAACCGTCAGATTAATTTGGA<br>ACTGTATGCCAGCTATGTGTATCTGAGCATGAGCTATTATTTTCGATCGTGATGATGTTGCCCT<br>GAAAACTTCGCAAAATACTTTCTGCATCAGAGCCATGAAGAACGTGAACATGCAGAAAACT<br>GATGAAACTGCAGAATCAGCGTGGTGGTTCGTATGCACTGGCAGATATCAAAAAACCGGATTG<br>TGATGATTGGGAAAGCGGTCTGAATGCAATGGAATGTGCACTGCATCTGGAAAAAATGTTAA<br>TCAGAGCCTGCTGGAAGTGCATAAACTGGCAACCGATAAAAAATGATCCGCATCTGTGCGATTT<br>TATCGAAACCCATTATCTGAACGAACAGGTGAAAGCCATTAAGAAGTGGGTGATCATGTTAC<br>CAATCTGCGTAAATGGGTGCACCGGAAAGTGGTCTGGCAGAATACCTGTTTGATAAACATAC<br>CCTGGGTGATAGCGATAACGAAAGCTAATAAGGATCCGGCTGCTAACAAAGCCCGAAAGGAAG<br>CTGAGTTGGCTGCT |
| H-Ft Mutant C<br>(primer forward)      | GCGTGGTGGTTCGTATCGCTCTGGCGGATATCAAAAAACCGGATTG                                                                                                                                                                                                                                                                                                                                                                                                                                                                                                                                                                                                                                                             |
| H-Ft Mutant C<br>(primer reverse)      | CAATCCGGTTTTTTGATATCCGCCAGAGCGATACGACCACCACGC                                                                                                                                                                                                                                                                                                                                                                                                                                                                                                                                                                                                                                                              |
| L-Ft<br>(nucleotide sequence)          | AGCAGCCAGATTCGTCAGAATTATCAACAGATGTTGAAGCAGCAGTTAATAGCCTGGTTAAT<br>CTGTATCTGCAGGCAAGCTATACTATCTGAGCCTGGGTTTCTATTTTGATCGTGATGATGTT<br>GCACTGGAAGGTGTGAGCCATTTTTTTCTGTAAGTGGCCGAAGAAAAACGCGAAGGTTATGAA<br>CGTCTGCTGAAAAATGCAGAATCAGCGTGGTGGTCTGCACTGTTTCAGGATATCAAAAAACCT<br>GCCGAAGATGAAATGGGGTAAAACACCGGATGCAATGAAAGCAGCAATGGCACTGGAAAAA<br>CTGAATCAGGCACTGCTGGATCTGCATGCACTGGGTAGCGCACGTACCGATCCGCATCTGTGT<br>GATTTCTGGAACCCACTTTCTGGATGAAGAAGTGAAGTGAATTAAGAAGTGGGCGATCAT<br>CTGACCAATCTGCATCGTTTTAGTGGTCCGGAAGCAGGTCTGGGTGAATACCTGTTTGAACGC<br>CTGACACTGAAACACGAT                                                                                                                                        |
| L-Ft Mutant D<br>(nucleotide sequence) | CTCTAGAAATAATTTTGTTTAACTTTAAGAAGGAGATATACATATGAGCAGCCAGATTCGTCA<br>GAATTATTACAGGATGTTGAAGCAGCAGTTAATCGTCTGGTTAATCTGTATCTGCAGGCAAG<br>CTATACCTATCTGAGCCTGGGTTTCTATTTTGATCGTGATGATGTTGCATGGAAGGTGTGAG<br>CCATTTTTTTCTGTAAGTGGCCGAAGAAAAACGCGAAGGTTATGAACTGCTGAAAATGCA<br>GAATCAGCGTGGTGGTTCGTGATTTTTTTCAGGATATCAAAAAACCTGCCGAAGATGAATGGG<br>TAAAACACCGGATGCAATGAAAGCAGCAATGGCACTGGAAAAAATGAAATCAGGCACTGCT<br>GGATCTGCATGCACTGGGTAGCGCACGTACCGATCCGCATCTGTGTGATTTTTCTGGAACCCA<br>CTTCTGGATGAAGAAGTGAAGTGAATTAAGAAGTGGGCGATCATCTGACCAATCTGCATCG<br>TTTAGTGGTCCGGAAGCAGGTCTGGGTGAATACCTGTTTGAACGCCTGACACTGAAACACGA<br>TTAATAAGGATCCGAATTCGAGCTCCGTCGACAAGCTTGGCCGCACTCGAG                                       |
| AfFt<br>(nucleotide sequence)          | GCAAGCATCAGCGAAAAAATGGTTGAAGCACTGAATCGTCAGATTAACGCAGAAATCTATAGC<br>GCCTATCTGTATCTGAGCATGGCGAGCTATTTTGATAGCATTGGTCTGAAAGGCTTTAGCAAT<br>TGGATGCGTGTTCAGTGGCAAGAGGAAGTGTGTCATGCAATGAAATGTTTGGATTTTGTGAGC<br>GAACCGCGCGGCCGCGTGAACCTGTATGCGGTGGAAGAACCAGGCAATGGGATAGTCCG<br>CTGGCTGCTTTTGAACATGTTTATGAACATGAAGTGAACGTGACCAACGCATTCATGAACTG<br>GTTGAAATGGCCATGCAAGAAAAAGATTTTGGCAGCTATAACTTCTGCAAGTGGTATGTTGCA<br>GAACAGGTTGAAGAAGAAGCGAGCGCACTGGATATGTTTGAAGTGAAGTGAAGTGAAGTGAAG<br>GATAACGTGCACTGCTGTTTTCTGGATAAAGAACTGAGCCTGCGCCAGTTTACCCCTCCGGCA<br>GAAGAAGAGAAA                                                                                                                                            |

## Supplementary References

- 1 Larkin, M. A. *et al.* Clustal W and Clustal X version 2.0. *Bioinformatics* **23(21)**, 2947-2948 (2007).
- 2 Niitsu, Y. & Listowsky, I. Mechanisms for the formation of ferritin oligomers. *Biochemistry* **12(23)**, 4690-4695 (1973).
- 3 Radoshitzky, S. R. *et al.* Machupo virus glycoprotein determinants for human transferrin receptor 1 binding and cell entry. *Plos One* **6**, e21398 (2011).
- 4 Gruszczyk, J. *et al.* Cryo-EM structure of an essential Plasmodium vivax invasion complex. *Nature* **559(7712)**, 135-139 (2018).
